# Supplementary material for: Heterobimetallic intermediates in alkene insertion reactions into a Pd–acetyl bond
Source: Royal Society of Chemistry journal article supplement (doi:10.1039/b007171o), 2001-01-01
Supplement: b007171o.doc [file b007171o.doc]

**Electronic Supplementary Information for**

**Chem. Commun. B007171O**

_________________________________________________________________________

**Heterobimetallic intermediates in alkene insertion reactions into a Pd-acetyl bond**

_________________________________________________________________________

**Pierre Braunstein,*a* Jérôme Durand,*a* Michael Knorr*a,b* and Carsten Strohmann*c***

*a Laboratoire de Chimie de Coordination (UMR 7513 CNRS), Institut Le Bel, Université Louis Pasteur, 4 rue Blaise Pascal, F-67070 Strasbourg, France. E-mail: braunst@chimie.u-strasbg.fr*

*b Laboratoire de Materiaux Moléculaires et Interfaces, Faculté des Sciences et Techniques, Université de Franche-Comté, 16 route de Gray F-25030 Besançon, France. E-mail: michael.knorr@univ-fcomte.fr*

*c Institut für Anorganische Chemie, Universität Würzburg, Am Hubland, D-97074 Würzburg, Germany*

**Experimental**

**Synthesis**

All reactions were performed using Schlenk tube techniques under an atmosphere of purified nitrogen. Solvents were freshly distilled under nitrogen from the usual drying agent prior to use. Nitrogen was passed through BASF R3-11 catalyst and molecular sieves columns to remove residual oxygen and water. The 1H and 31P{1H} NMR spectra were recorded at 300.13 and 121.5 MHz respectively on a FT Bruker AC 300 instrument. Infrared spectra were recorded in the 4000-400 cm-1 range on a IFS-66 Bruker FTIR spectrometer and in the 400-90 cm-1 range on a IFS-113 Bruker FTIR spectrometer. Samples were prepared as KBr pellets or solutions using CaF2 cells.

The ligands dppx (dppm = Ph2PCH2PPh2,1 dppa = Ph2PNHPPh2)2 and the complex [PdCl(Me)(COD)]3 were prepared according to published procedures.

Selected spectroscopic data (all 1H, 13C{1H} and 31P{1H} NMR spectra were recorded in CDCl3 at 298 K unless otherwise specified).

Synthesis of [Fe(CO)4(dppm-*P*)], [Fe(CO)4(dppa-*P*)]. Me3NO, 2 H2O (2.22 g, 20 mmol) was dissolved in toluene and the solution was then evaporated under reduced pressure. The resulting white solid was then added to a stirred mixture containing dppx (20 mmol) and Fe(CO)5 (2.63 ml, 3.92 g, 20 mmol) in CH2Cl2. When gas evolution has stopped, the reaction mixture was evaporated under reduced pressure. The resulting solid contained *ca* 60-70% of the desired compound and was then purified by column chromatography (hexane/toluene, 1:1).

Synthesis of **1a,b**. To a stirred solution of [PdCl(Me)(COD)] (3.61 g, 13.6 mmol) in CH2Cl2 was added solid [Fe(CO)4(dppx-*P*)] (13.6 mmol). Because of its very low solubility, **1a** precipitated and was thus filtered, washed twice with Et2O and then with hexane. In the case of **1b**,the solvent was removed under reduced pressure after *ca* 1 h. The resulting solid was then washed with hexane and dried under vacuum.

*Selected data for* **1a**: 31P{1H} NMR:  111.0 (d, PFe), 79.8 (d, PPd, 2+3*J*PP 63 Hz). 1H NMR (acetone-*d*6):  1.12 (d, 3H, PdCH3, 3*J*PH 3.9 Hz), 5.52 (m, br, 1H, NH). IR (KBr): NH 3332 w; CO 2057 vs, 1993 m, 1951 s, 1939 s.

*Selected data for* **1b**: 31P{1H} NMR:  64.9 (d, PFe), 34.3 (d, PPd, 2+3*J*PP 59 Hz). 1H NMR:  1.21 (d, 3H, PdCH3, 3*J*PH 3.5 Hz), 3.49 (t, 2H, PCH2P, 2*J*PH 11.2 Hz). IR (CH2Cl2): CO 2064 vs, 1998 m, 1957 s, 1929 s.

Synthesis of **2a**. A suspension of **1a** in CH2Cl2 was charged into a stainless steel reactor which was pressurized with 20 bars of CO and stirred at room temperature for 1 h (31P{1H} NMR monitoring of the solution showed that after 30 min the reaction was not completed). The pressure was then released and the solvent was removed under reduced pressure. **2a** was then washed twice with pentane and dried under vacuum.

*Selected data for* **2a**: 31P{1H} NMR:  113.4 (d, PFe), 64.7 (d, PPd, 2+3*J*PP 67 Hz). 1H NMR (acetone-*d*6):  2.32 (s, 3H, C(O)CH3), 5.49 (m, br, 1H, NH). IR (CH2Cl2):CO 2059 vs, 1991 m, 1950 br, 1716 m.

Synthesis of **2b**. A solution of **1b** in CH2Cl2 was stirred for 3 h under an atmosphere of CO. The solution was then filtered and evaporated under reduced pressure. The solid obtained was washed with hexane and dried under vacuum.

*Selected data for* **2b**: 31P{1H} NMR:  64.9 (d, PFe), 18.1 (d, PPd, 2+3*J*PP 65 Hz). 1H NMR:  2.36 (s, 3H, C(O)CH3), 3.46 (m, br, 2H, PCH2P). IR (CH2Cl2): CO 2064 vs, 2000 m, 1958 s, 1931 s, 1715 m.

Synthesis of **3a** and **3a'**. A suspension of **1a** (0.355 g, 0.5 mmol) in CH2Cl2 (5 ml) was reacted with a stoichiometric amount of RNC dissolved in 4 ml of CH2Cl2 . The suspension dissolved rapidly and IR and 31P NMR monitoring of the clear yellowish solution indicated almost quantitative formation of the iminoacyl complexes **3** after 10 min. The pure compounds were obtained in ca. 90% yield as yellow, air stable solids by precipitation from a concentrated solution by addition of hexane. Recrystallisation from CHCl3/hexane afforded crystals of **3a** suitable for X-ray diffraction.

*Selected data for* **3a**: 31P{1H} NMR:  85.2 (d, PFe), 61.75 (d, PPd, 2+3*J*PP 59 Hz). 1H NMR:  1.92 (s, 6H, xylylCH3), 2.11 (s, 3H, C(=N)CH3), 6.75 (m, br, 1H, NH). IR (CH2Cl2): CO 2053 s, 1985 m, 1948 s, 1928 s; CN 1630 m**.**

*Selected data for* **3a'**: 31P{1H} NMR:  84.9 (d, PFe), 58.4 (d, PPd, 2+3*J*PP 59 Hz). 1H NMR:  2.63 (s, 3H, C(=N)CH3), 3.49 (d, br, 1H, C*HA*HB, 2*J*HH 14.9 Hz), 5.38, (dd, 1H, CHA*HB*, 2*J*HH 14.9 Hz, *J*PH 6.1 Hz), 6.87 (m, br, 1H, NH). IR (CH2Cl2): CO 2053 s, 1984 m, 1946 s, 1923 s; CN 1589 w.

Synthesis of **4a,b**. 1) To a solution of **2a,b** in CH2Cl2 containing MeCN was added solid AgBF4 (1.2 equiv). The solution was then filtered and the solvents removed under reduced pressure. The desired compounds were recrystallized from CH2Cl2/Et2O.

2) Complexes **4a,b** could also be prepared from **1a,b** by reaction in CH2Cl2 containing MeCN with AgBF4 (1.2 equivalent) under an atmospheric pressure of CO. The same procedure as in method 1 was then used for isolation of the products.

*Selected data for* **4a**: 31P{1H} NMR:  108.7 (d, PFe), 65.7 (d, PPd, 2+3*J*PP 58 Hz). 1H NMR:  1.91 (s, 3H, CH3CN), 2.28 (s, 3H, C(O)CH3), 6.20 (m, br, 1H, NH). IR (CH2Cl2): CO 2065 vs, 2006 m, 1975 s, 1951 vs, 1715 m.

*Selected data for* **4b**: 31P{1H} NMR:  61.8 (d, PFe), 20.3 (d, PPd, 2+3*J*PP 56 Hz). 1H NMR:  1.96 (s, 3H, CH3CN), 2.36 (s, 3H, C(O)CH3), 3.65 (t, 2H, PCH2P, 2*J*PH 11.3 Hz). IR (KBr): CO 2065 vs, 2006 m, 1971 s, 1942 s, 1730 m; (CH2Cl2): CO 2063 vs, 2005 m, 1971 s, 1942 vs, 1728 m.

Reactions of alkenes with **4a,b** (Synthesis of **5-8**). Theses reactions were performed in CH2Cl2 in the presence of an excess of alkene: 1 atm. for ethylene (**5a,b**, reaction time: 15 h), *ca.* 10 equivalents for methyl acrylate (**6 a,b**, reaction time: 18 h), norbornadiene and norbornadiene-2,3-dicarboxylate (**7** and **8**, reaction time: 30 min). In all cases, the reaction mixture was then evaporated under reduced pressure and the residue washed with Et2O and hexane. The desired products were recrystallized from CH2Cl2/Et2O.

*Selected data for* **5a**: 31P{1H} NMR:  106.8 (d, PFe), 80.0 (d, PPd, 2+3*J*PP 46 Hz). 1H NMR:  2.04 (t, unresolved, 2H, PdCH2), 2.47 (s, 3H, C(=O)Me), 3.25 (t, unresolved, 2H, CH2), 6.51 (t, br, 1H, NH, 2*J*PH 5.5 Hz). IR (CH2Cl2): CO 2071 vs, 2012 m, 1975 s, 1945 s, 1634 m.

*Selected data for* **5b**: 31P{1H} NMR:  60.6 (d, PFe), 36.2 (d, PPd, 2+3*J*PP 46 Hz). 13C{1H} NMR:  236.6 (s, *C*(=O)CH3), 210.0 (vbr, Fe(CO)4), 133.3 -129.0 (m, phenyl), 51.8 (s, *C*H2C(=O)), 41.5 (d, PdCH2, 2*J*PC 4 Hz) 39.7 (t, PCH2P, 1*J*PC 25 Hz), 28.1 (s, C(=O)*C*H3). 1H NMR:  2.03 (t, unresolved, 2H, PdCH2), 2.47 (s, 3H, C(=O)Me), 3.21 (t, unresolved, 2H, CH2), 3.74 (t, 2H, PCH2P, 2*J*PH 11.9 Hz). IR (CH2Cl2): CO 2070 vs, 2011 m, 1970 s, 1938 s, 1633 m.

*Selected data for* **6a**: 31P{1H} NMR:  103.5 (d, PFe), 77.5 (d, PPd, 2+3*J*PP 42 Hz). 1H NMR:  2.59 (s, 3H, C(=O)Me), 2.87 (m, unresolved, 1H, PdCH), 3.04 (d, br, 1H, C*HA*HB 2*J*HH 18.9 Hz), 3.08 (s, 3H, C(=O)OMe), 3.40 (dd, br, 1H, CHA*HB*, 2*J*HH 18.9, 3*J*HH 5.5 Hz), 6.66 (m, br, 1H, NH). IR (CH2Cl2): CO 2076 vs, 2019 m, 1982 s, 1957 s, 1733 s, 1634 m. MS FAB+: 788 (100%).

*Selected data for* **6b**: 31P{1H} NMR:  55.6 (d, PFe), 30.7 (d, PPd, 2+3*J*PP 42 Hz). 1H NMR:  2.61 (s, 3H, C(=O)Me), 2.70 (m, unresolved, 1H, PdCH), 2.94 (d, br, 1H, C*HA*HB, 2*J*HH 19.0 Hz), 3.19 (s, 3H, C(=O)OMe), 3.28 (dd, br, 1H, CHA*HB*, 2*J*HH 19.0, 3*J*HH 5.1 Hz), 3.97 (m, 2H, PCH2P). IR (CH2Cl2): CO 2074 vs, 2018 m, 1979 s, 1947 vs, 1734 s, 1633 m. MS FAB+: 787 (85%).

*Selected data for* **7**: 31P{1H} NMR:  58.6 (d, PFe), 32.9 (d, PPd, 2+3*J*PP 47 Hz). 1H NMR:  1.31 (d, br, 1H, CH, *J* 8.5 Hz), 1.61 (d, 1H, CH, *J* 8.9 Hz), 1.81 (ddd, 1H, CH), 2.23 (s, br, 1H, CH), 2.58 (s, 3H, C(=O)Me), 2.84 (d, 1H, CH, *J* 5.9 Hz), 3.84 (m, 2H, PCH2P), 5.24 (dd, 1H, =CH, *J* 2.6 and 5.0 Hz), 5.96 (dd, 1H, =CH, *J* 2.6 and 5.0 Hz).13C NMR:  27.5 (s, C(=O)*Me*), 38.7 (t, PCP, 1*J*PC 26 Hz), 48.3 (s, 1C), 48.9 (s, 1C), 63.7 (d, 1C, *J*PC 7 Hz), 65.0 (s, 1C), 125.1 - 134.4 (m, phenyl), 136.3 (s, 1C, =C), 136.4 (s, 1C, =CH), 209.9 (vb, Fe(CO)4), 236.5.(s, *C*(=O)Me). IR (CH2Cl2): CO 2069 vs, 2010 m, 1968 s, 1937 s, 1626 m.

*Selected data for* **8**: 31P{1H} NMR:  57.1 (d, PFe), 32.1 (d, PPd, 2+3*J*PP 46 Hz). 1H NMR:  1.68 (d, br, 1H, CH, *J* 9.2 Hz), 1.90 (d, br, 1H, CH, *J* 9.2 Hz), 2.05 (t, unresolved, 1H, CH), 2.66 (s, 3H, C(=O)Me), 2.71 (s, br, 2H, 2 overlaping CH), 3.06 (d, 1H, CH, *J* 5.4 Hz), 3.51 (s, 3H, C(=O)OCH3), 3.70 (s, 3H, C(=O)OCH3), 3.81 (m, 1H, PC*HA*HBP), 3.96 (m, 1H, PCHA*HB*P). 13C NMR:  27.7 (s, C(=O)*Me*), 40.4 (t, PCP, 1*J*PC 25 Hz), 45.7 (s, 1C), 50.2 (s, 1C), 52.1 (s, br, 2C, C(=O)O*C*H3), 58.9 (d, 1C, *J*(P-C) 4 Hz), 65.50 (s, 1C), 124.8 - 134.5 (m, phenyl), 139.0 (s, 1C, =C), 145.1 (s, 1C, =CH), 163.3 (s, *C*(=O)OCH3), 163.8 (s, *C*(=O)OCH3), 219.2 (vb, Fe(CO)4), 235.9.(s, *C*(=O)Me). IR (CH2Cl2): CO 2071 vs, 2014 m, 1971 s, 1939 s, 1721 m, br, 1631 m.

Evidence for the formation of **9a,b**.A solution of **5a,b** in CH2Cl2 was stirred for 4 h under an atmospheric pressure of CO. NMR and IR measurements of the crude reaction mixture showed unambiguous evidence for the formation of **9a,b**, but all attempts to isolate these compounds were unsuccessfull owing to the reversibility of the reaction under reduced pressure. When the reaction leading to **9a** was performed in the presence of a few drops of MeCN, CO insertion was much faster. IR monitoring showed the presence of a new absorption at 1710 cm-1, corresponding to the opening of the six-membered chelate due to the coordination of MeCN to palladium. This (C=O) absorption is similar to that observed at 1713 cm-1 when MeCN is added to a CH2Cl2 solution of **5a**.

*Selected data for* **9a**: 31P{1H} NMR:  107.8 (d, PFe), 68.6 (d, PPd, 2+3*J*PP 53 Hz). IR (KBr): CO 2064 vs, 2005 m, 1950 s, 1939 s, 1726 m (Pd-CO), 1624 m (COPd).

*Selected data for* **9b**: 31P{1H} NMR:  61.2 (d, PFe), 21.5 (d, PPd, 2+3*J*PP 52 Hz). IR (CH2Cl2): CO 2070 s, 2010 m, 1976 s, 1951 s, 1724 m (Pd-CO), 1630 m (COPd).

**Crystal Structure Determinations**.

*X-ray experimental procedures*: data for all complexes were recorded on a Stoe IPDS diffractometer, graphite monochromated Mo-K radiation ( = 0.71073 Å) at *T* = 173(2) K.

**References**

1 K. Sommer, *Z. Anorg. Chem.*, 1970, **376***,* 37.

2 H. Nöth and L. Meinl,  *Z. Anorg. Allg. Chem.*, 1967, **349***,* 223.

3 F. T. Lapido and G. K. Anderson, *Organometallics,* 1994, **13,**303.
